# Supplementary material for: A label-free screening approach targeted protease-activated receptor 1 based on dynamic mass redistribution in living cells
Source: Royal Society of Chemistry journal article supplement (doi:10.1039/c7ra07927c), 2017-01-01
Supplement: c7ra07927c1.pdf [file c7ra07927c1.pdf]

## Supplementary material

### **A label-free screening approach targeted protease- activated receptor 1 based on dynamic mass redistribution in living cells**

Weiwei Tang<sup>a</sup>, Bixia Huang<sup>a</sup>, Jiancheng Wang<sup>a</sup>, Lin An<sup>a</sup>, Huailing Zhong<sup>b</sup>, Hua  
Yang<sup>a</sup>, Ping Li<sup>a</sup>, Jun Chen<sup>a,\*</sup>

<sup>a</sup>*State Key Laboratory of Natural Medicines, China Pharmaceutical University,*

*Nanjing 210009, P. R. China*

<sup>b</sup>*U-Pharm Laboratories LLC, 239 New Rd, Suite A-107, Parsippany, NJ 07054 USA*

---

*Abbreviations:* PAR-1, protease activated receptor 1; DMR, dynamic mass redistribution.

\* Corresponding author. Tel.: +86-25-8327-1382; Fax: +86-25-8327-1379 (J. Chen);  
*E-mail address:* chenj2002cpu@126.com (J. Chen).

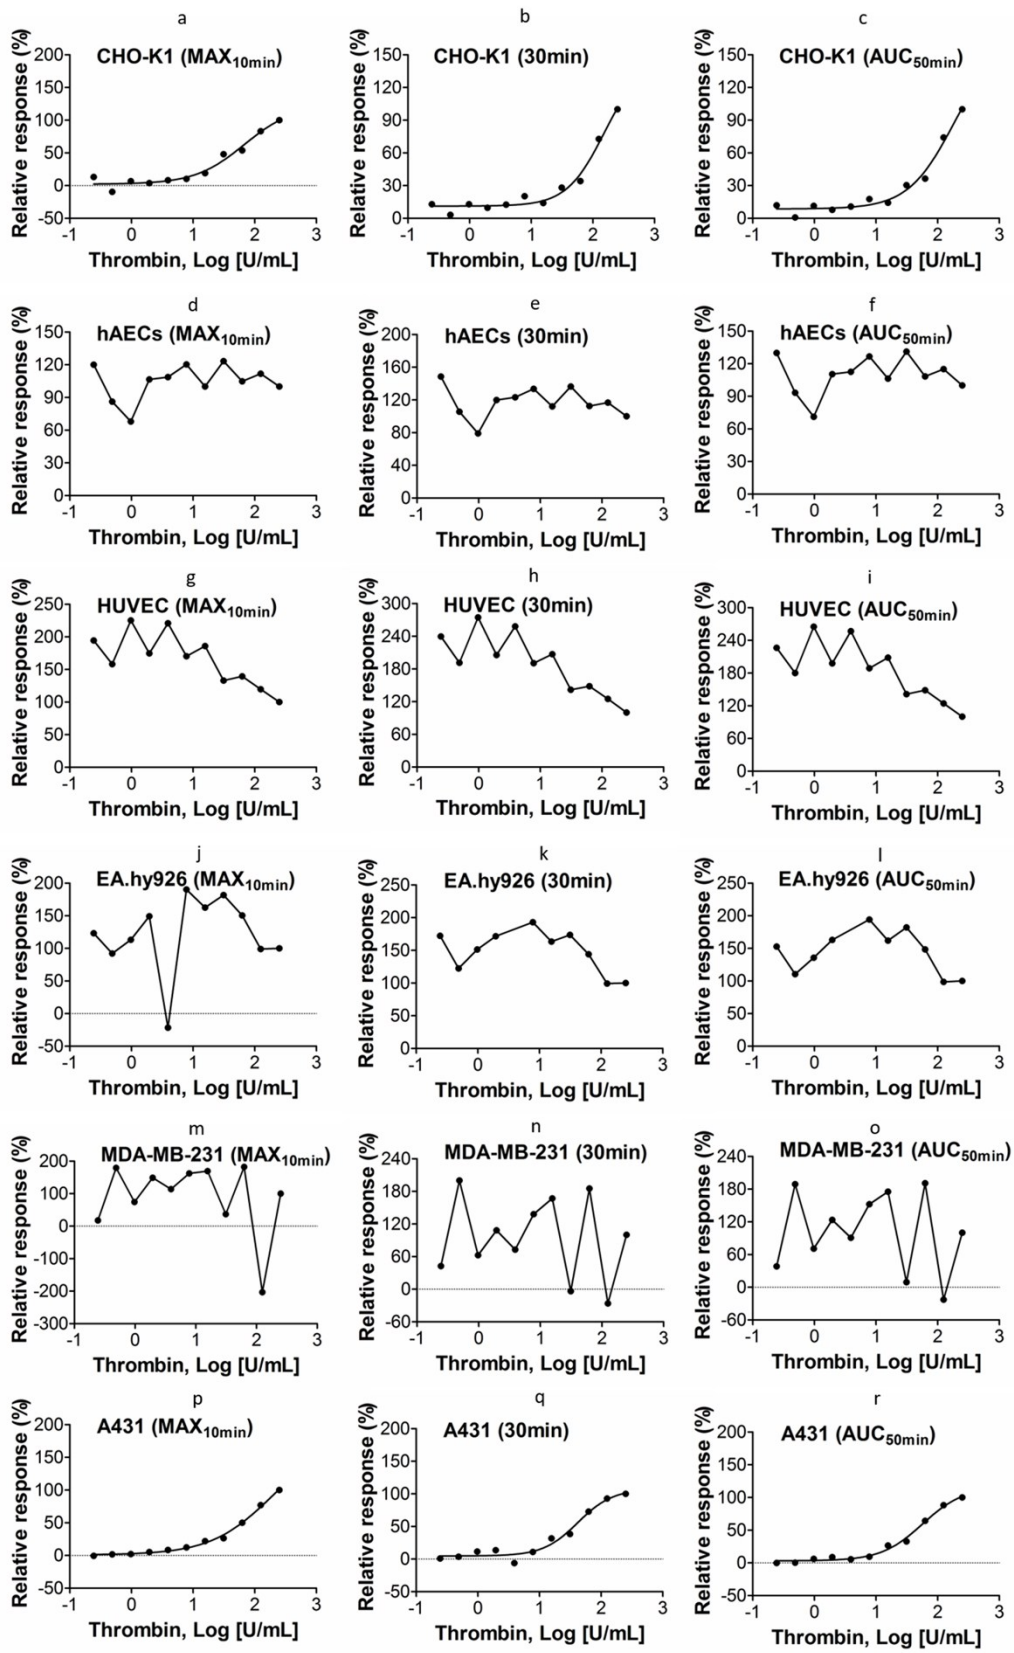

**Fig S1** Concentration effect curves resulting from different indicators after thrombin

activating in different cell types, indicators: maximum amplitude of 10min poststimulation ( $MAX_{10min}$ ), DMR responses from 30min time points poststimulation (30min), area under the response curve ( $AUC_{50min}$ ); cell types: A), B) and C) CHO-K1; D), E) and F) hAECs; G), H) and I) HUVEC; J), K) and L) EA.hy.926; M), N) and O) MDA-MB-231; P), Q) and R) A431.

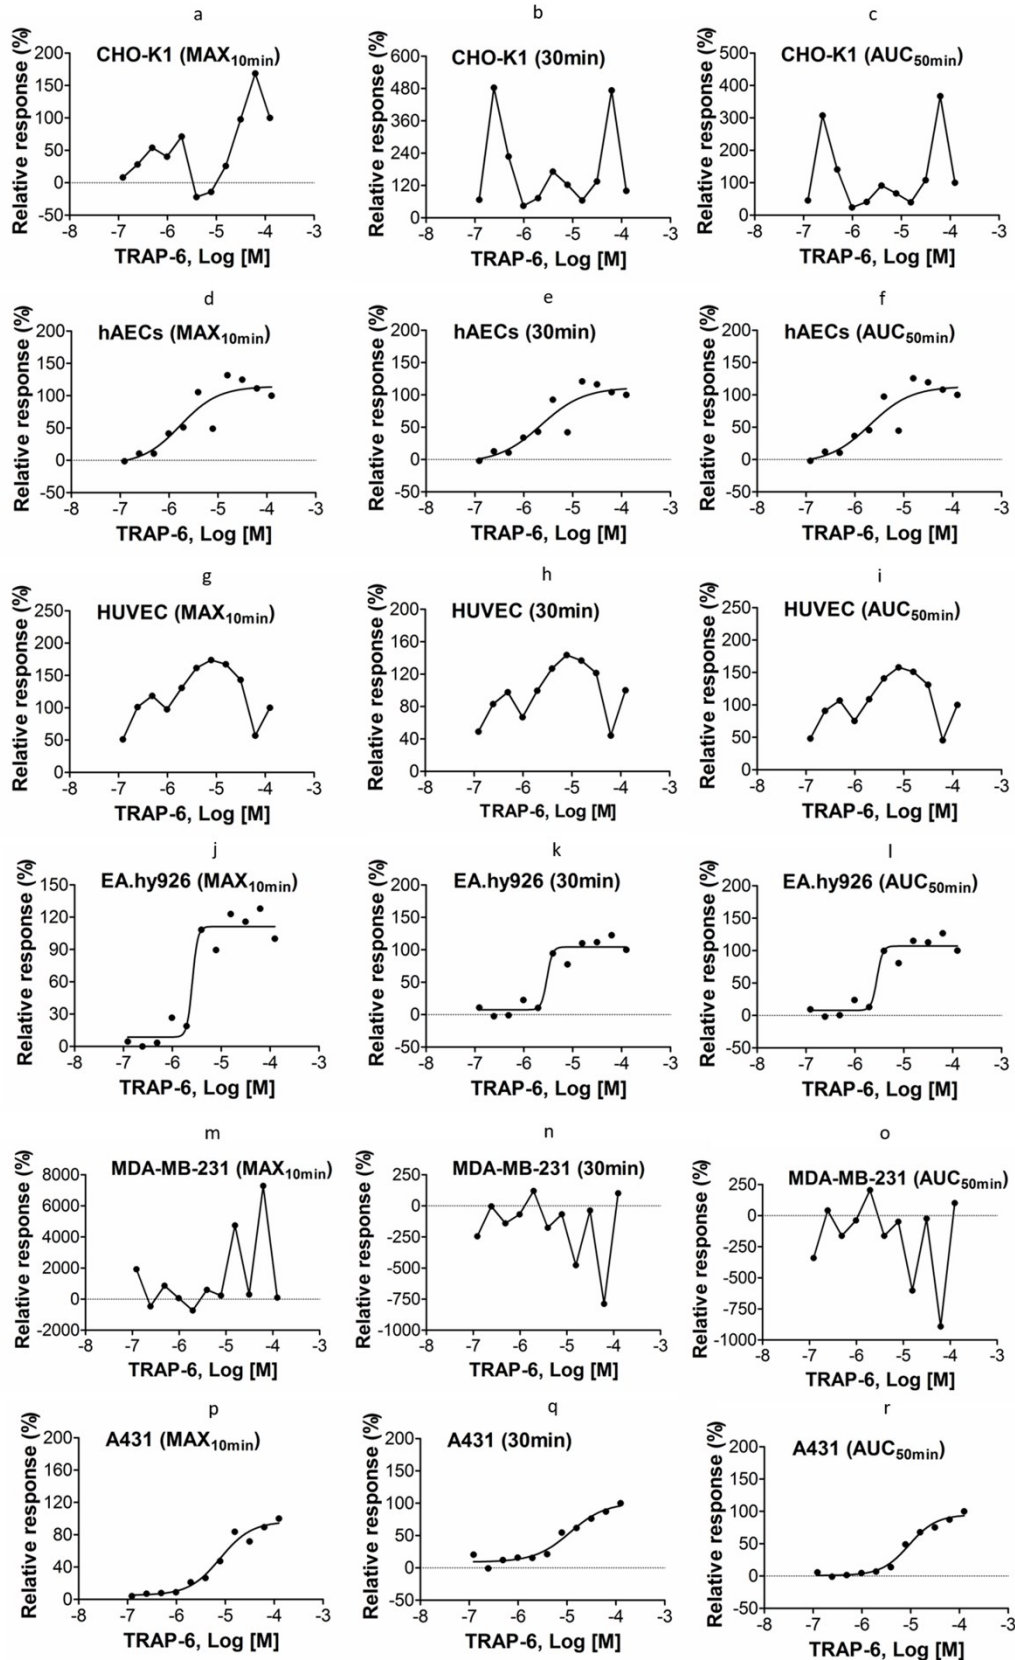

**Fig S2** Concentration effect curves resulting from different indicators after TRAP-6 activated in different cell types, indicators: maximum amplitude of 10min

poststimulation ( $MAX_{10min}$ ), DMR responses from 30min time points poststimulation (30min), area under the response curve ( $AUC_{50min}$ ); cell types: A), B) and C) CHO-K1; D), E) and F) hAECs; G), H) and I) HUVEC; J), K) and L) EA.hy.926; M), N) and O) MDA-MB-231; P), Q) and R) A431.

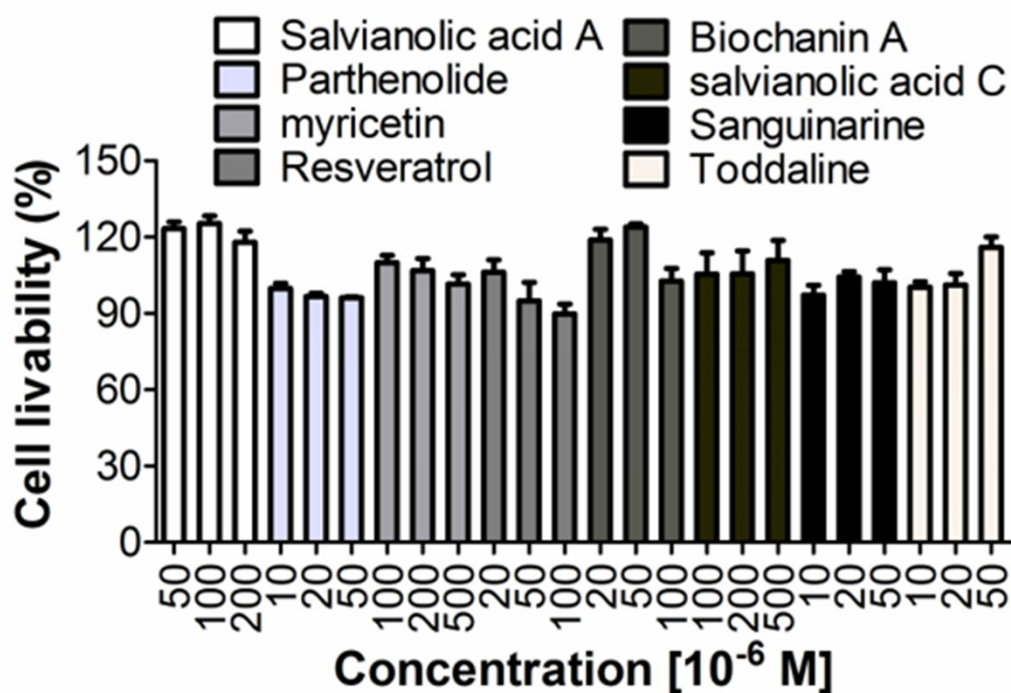

**FigS3** MTT assay for preliminary screened out compounds (potent compounds, data represent as mean  $\pm$  S.D.) ( $n=5$ )

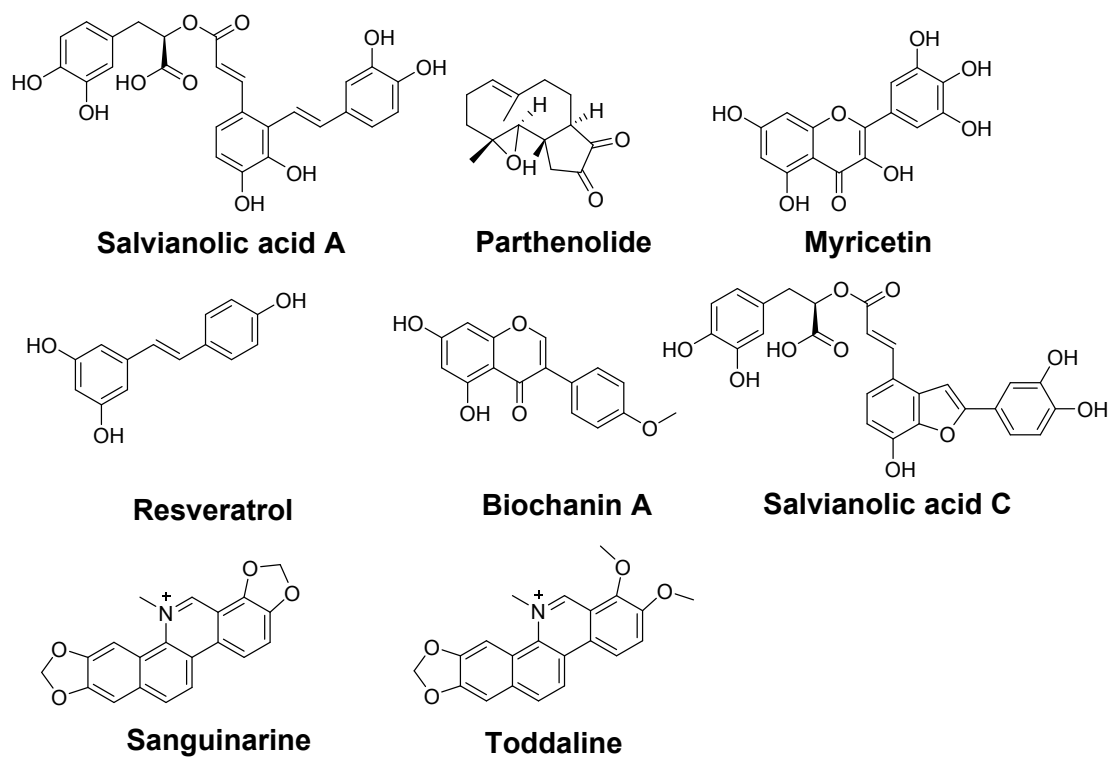

**FigS4** Chemical structures of eight screened out compounds from DMR secondary screening assay
